# Supplementary material
Source: publisher figshare collection journal article supplement (https://aacr.figshare.com/articles/dataset/_/23553162)
Supplement: Supplementary file 1 [file 41323671]

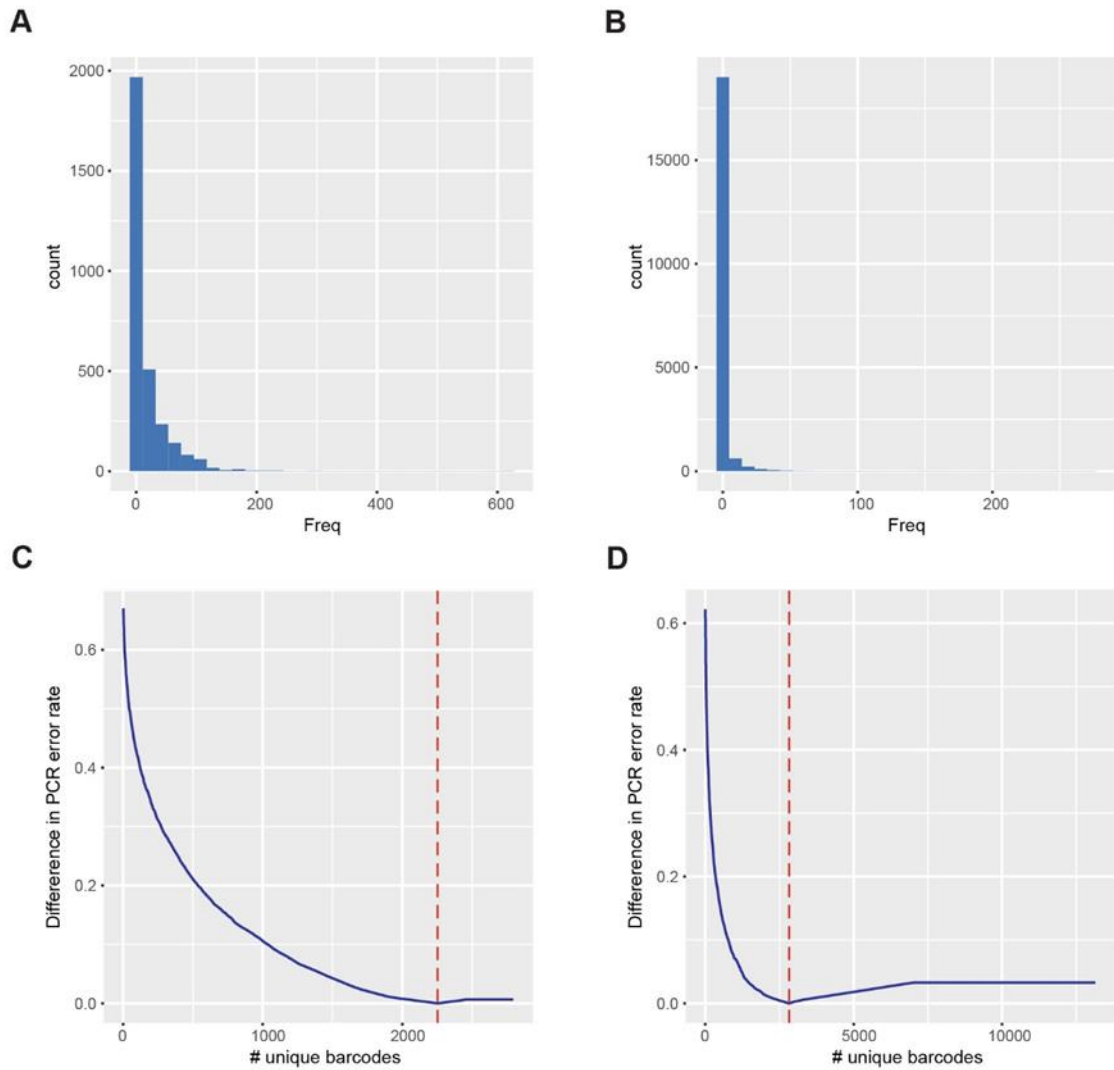

**Supplementary Figure S7 | Determination of LBC counts by PCR error correction.** Histogram of barcode frequency identified in the purified LBC vector (A) and the LBC vector packaged into retroviral particles (B). Estimation of minimal PCR error rate to determine corrected LBC count in the LBC vector (C) and the LBC vector packaged into retroviral particles (D).
